# Supplementary material for: Genomic characterization of DICER1-associated neoplasms uncovers molecular classes
Source: PubMed Central journal article supplement (PMC10039902; doi:10.1038/s41467-023-37092-w), 2023-03-25
Supplement: 41467_2023_37092_MOESM1_ESM.pdf [file 41467_2023_37092_MOESM1_ESM.pdf]

# Supplementary Information

Kommos et al., Genomic characterization of DICER1-associated neoplasms uncovers molecular classes

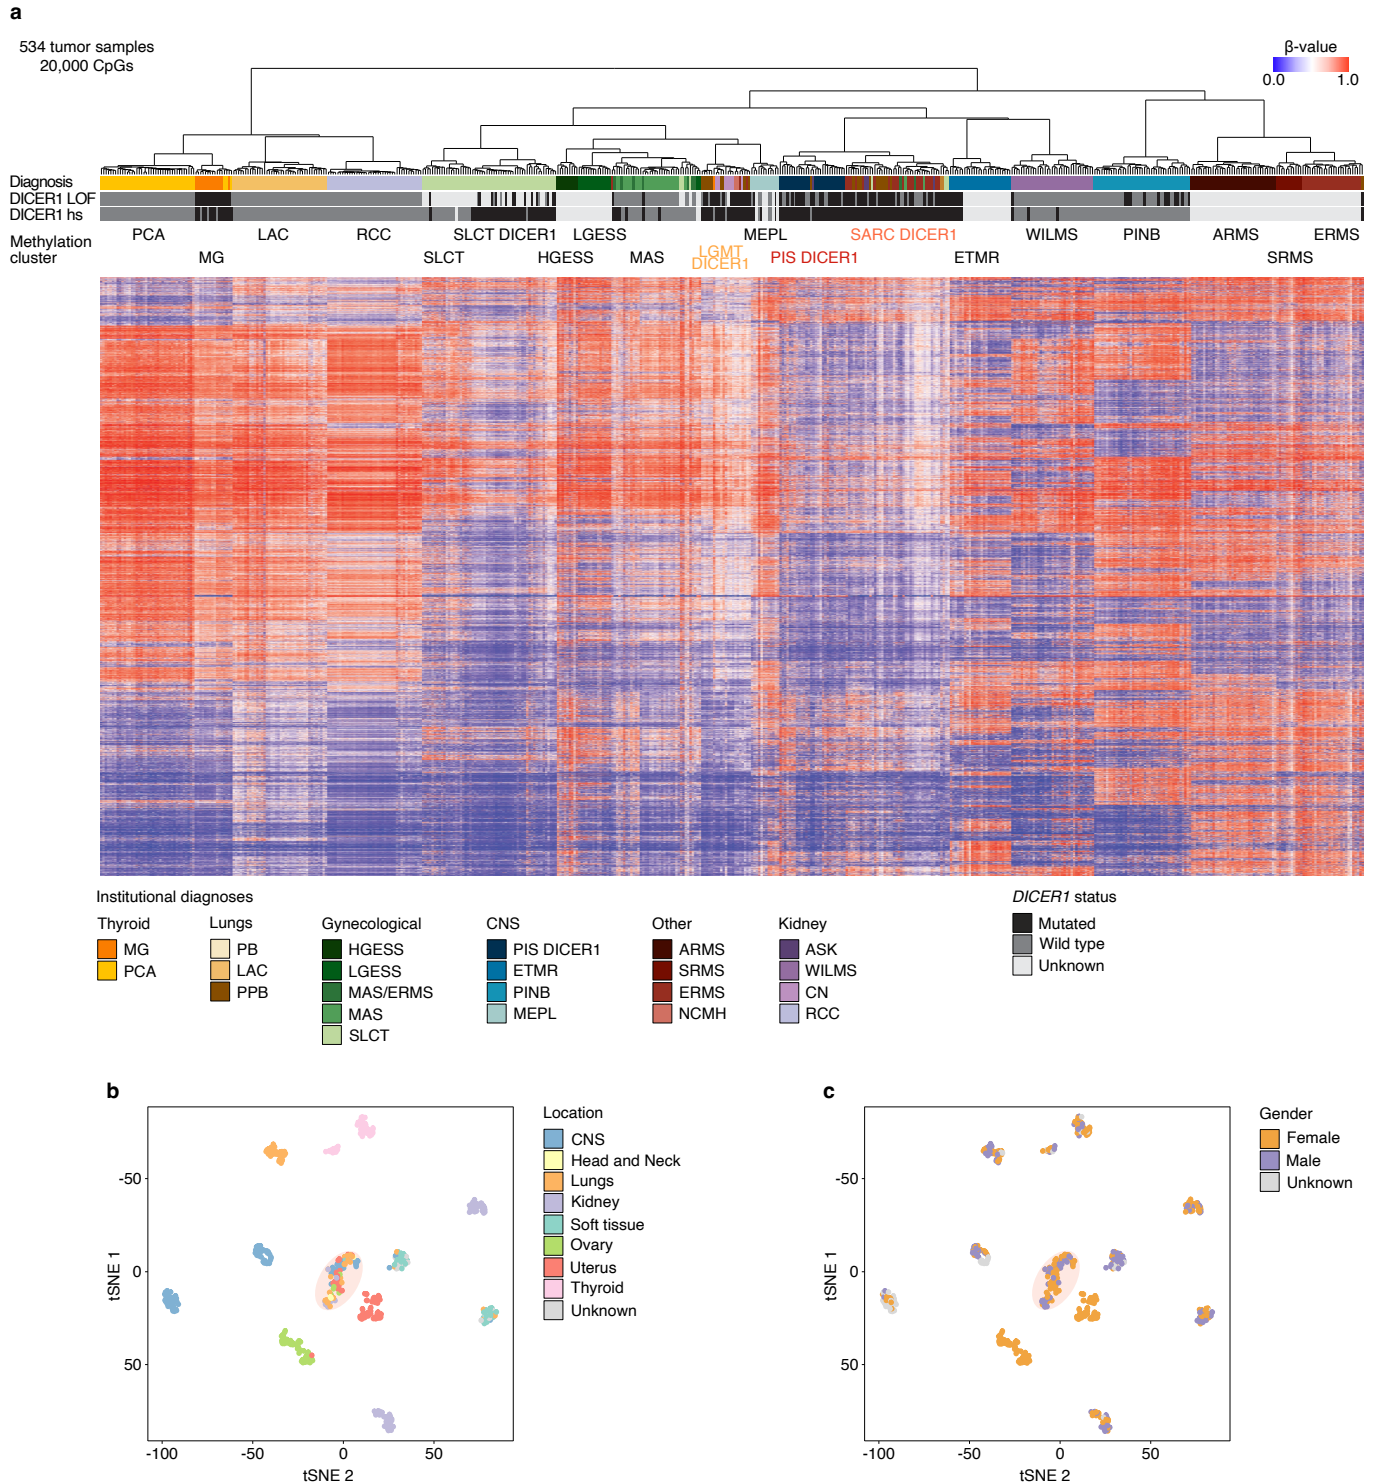

**Supplementary Figure 1: a - c, Molecular classification of DICER1-associated neoplasms by DNA methylation analysis** (related to Fig. 1). **a**, Unsupervised hierarchical clustering (Euclidean ward) of the 20,000 most differentially methylated CpGs. **b** and **c**, t-SNE dimensionality reduction of the 8,000 most differentially methylated CpGs. The same 534 tumor samples as in Fig. 1a are used. **(a)** Samples are colored according to their institutional diagnoses. Black indicates known DICER1-association, dark-grey indicates no DICER1 association and light-grey resembles unknown DICER1-association. **(b)** Cases are colored according to their anatomical location. **(c)** Cases are colored according to gender.

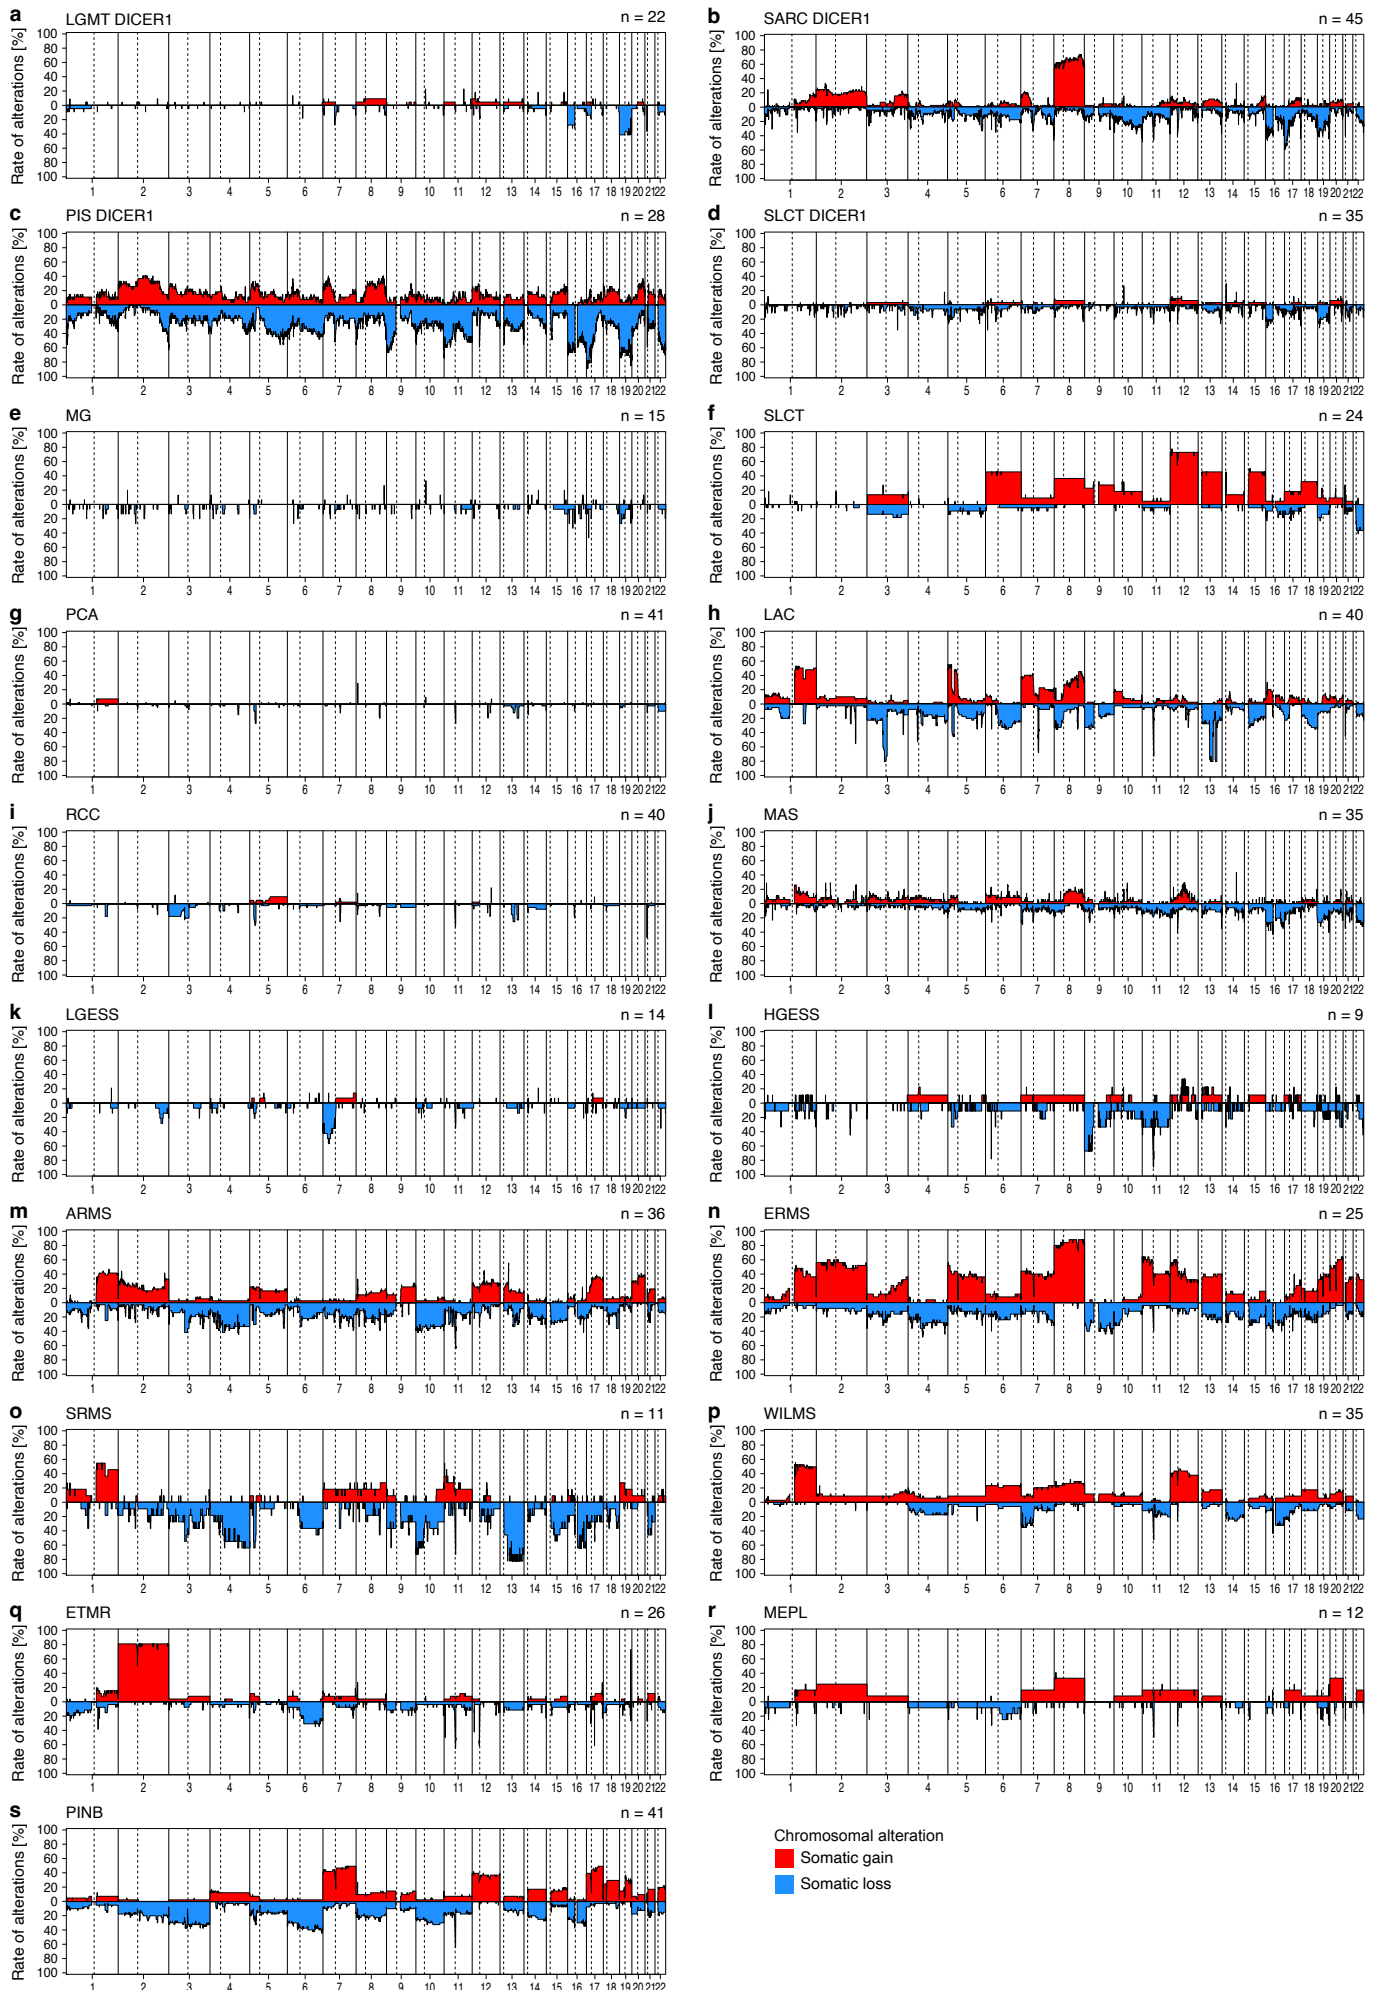

**Supplementary Figure 2: Cumulative copy number profiles of molecular classes identified by DNA methylation analysis (Fig. 1a, Supplementary Data 1). a - s, Plots showing the frequency of any chromosomal aberration at the respective loci. Chromosomes are numbered accordingly. Chromosomal gains are depicted in red and losses shown in blue.**

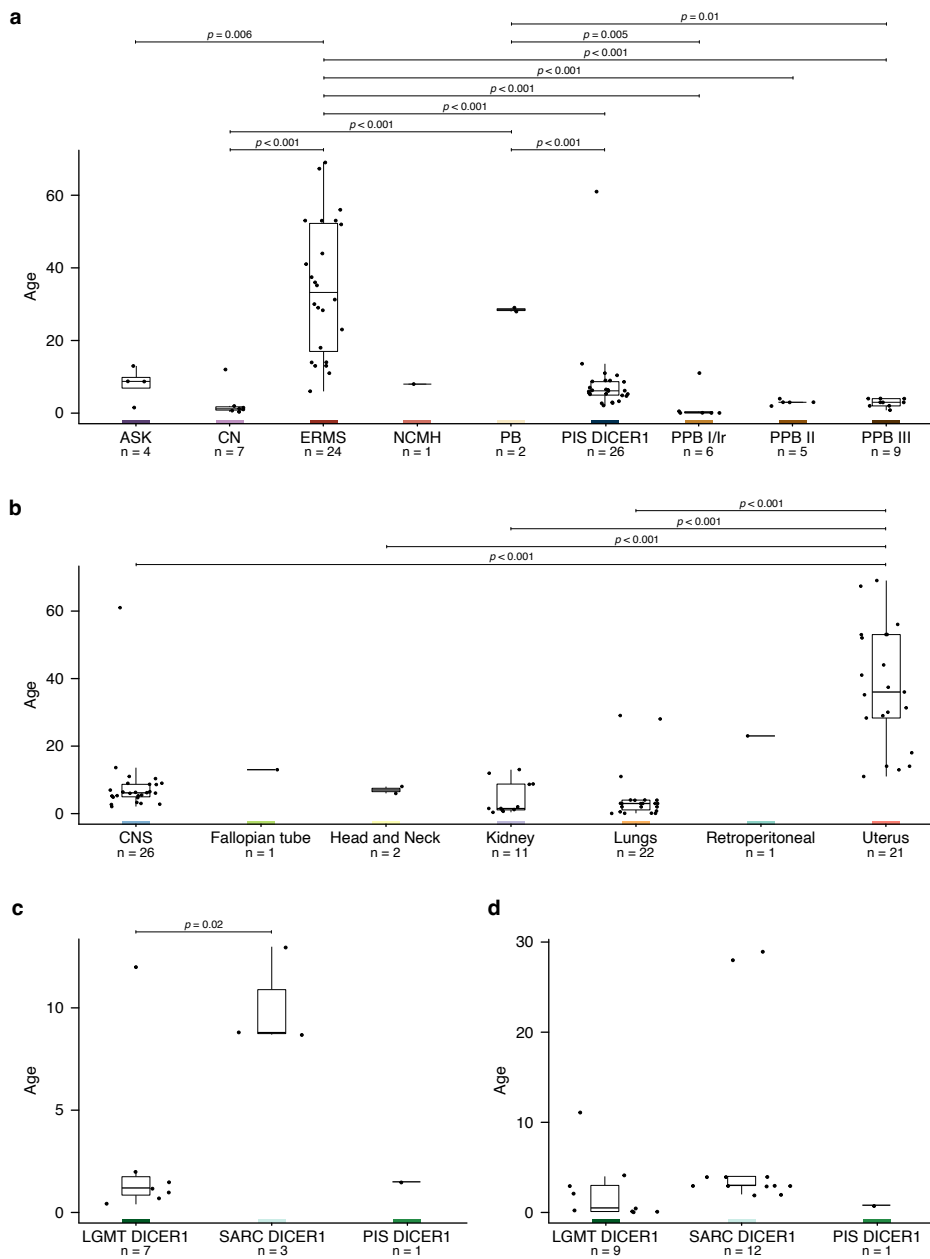

**Supplementary Figure 3: Age distribution of mesenchymal tumors with DICER1 alteration.** **a**, Age distribution of patients with LGMT DICER1, SARC DICER1 and PIS DICER1 according to institutional diagnoses. **b**, Age distribution of patients with LGMT DICER1, SARC DICER1 and PIS DICER1 according to tumor location. **c**, Age distribution of patients with kidney tumors according to LGMT DICER1, SARC DICER1 and PIS DICER1 methylation class assignment. **d**, Age distribution of patients with lung tumors according to LGMT DICER1, SARC DICER1 and PIS DICER1 methylation class assignment. Black lines mark the median, edges of boxes denote interquartile range (IQR), and vertical lines indicate 1.5 x IQR. Statistical significance was determined by the Games-Howell post-hoc test.



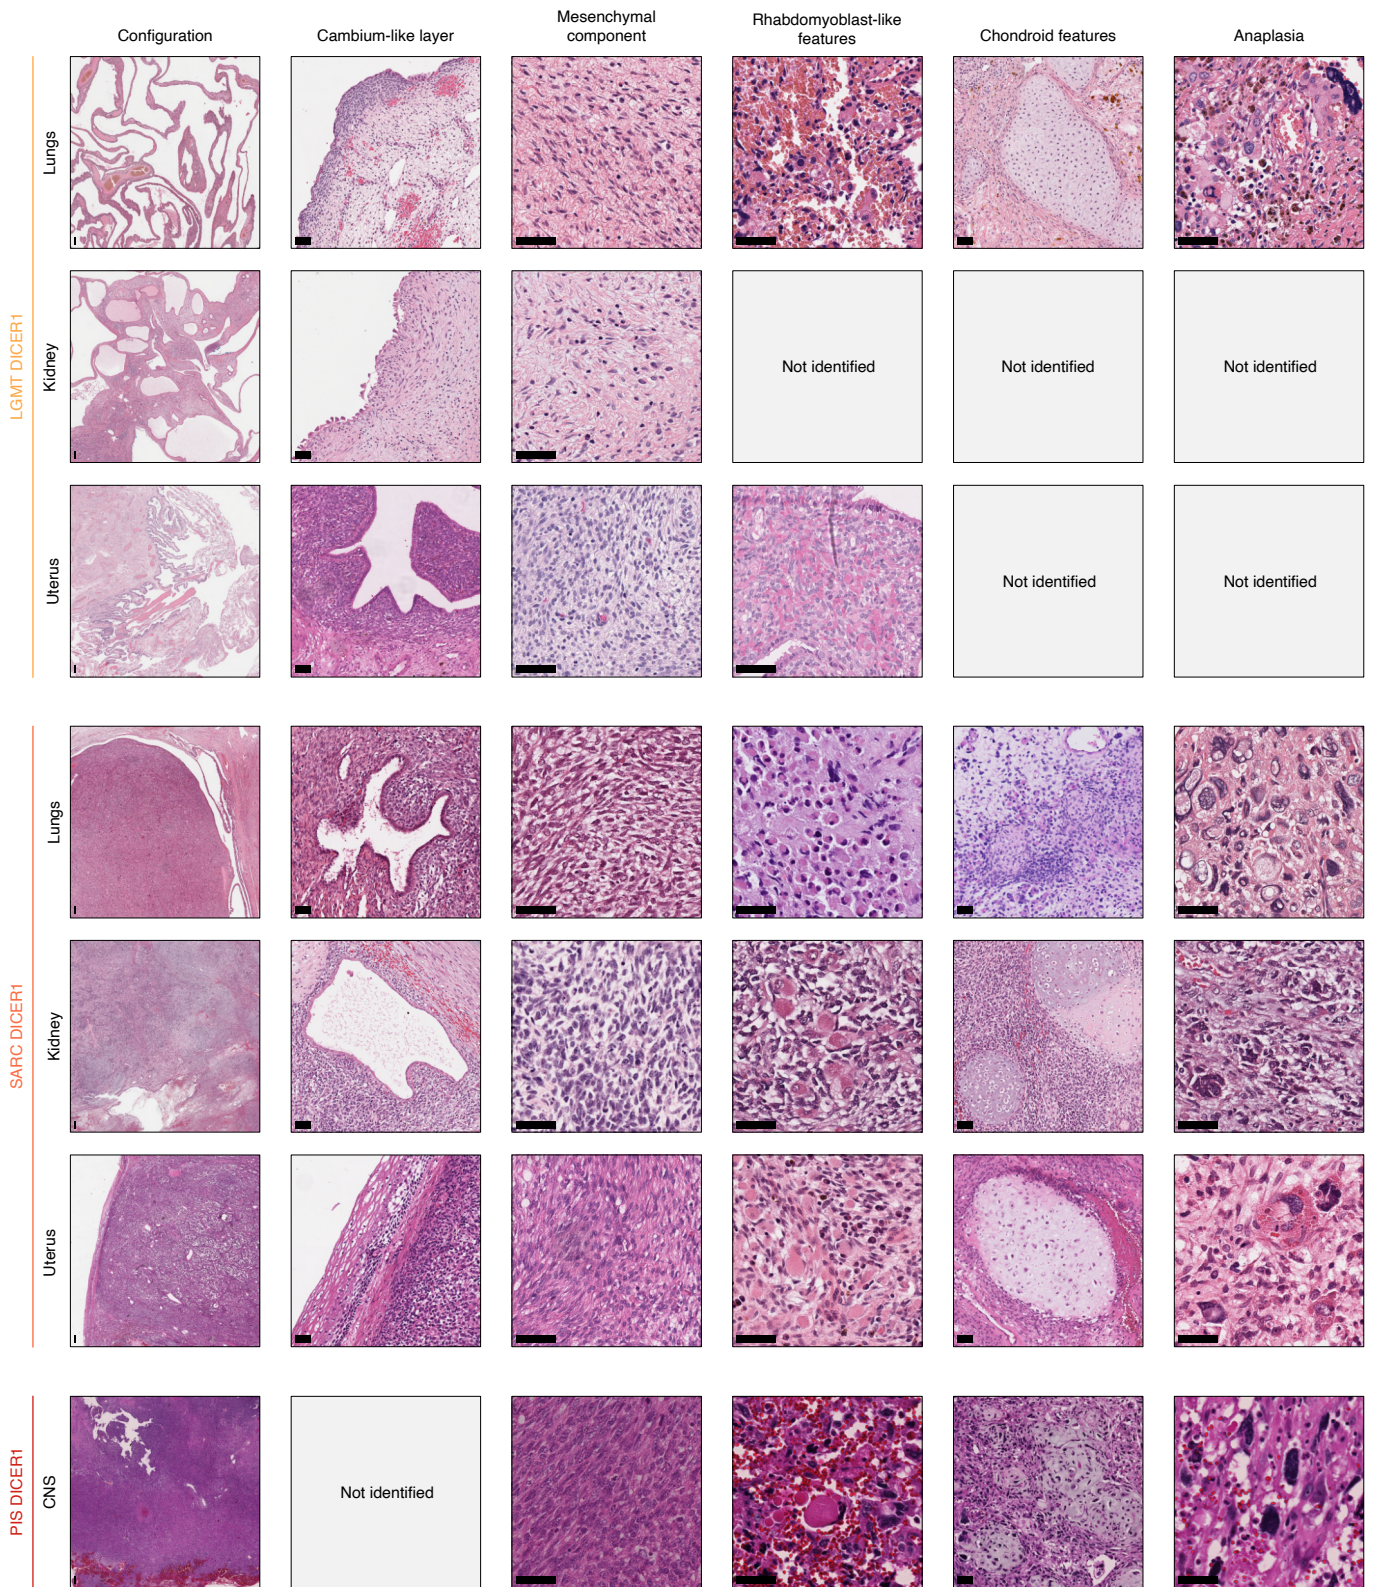

**Supplementary Figure 4: Histological features of mesenchymal tumors with DICER1 alteration.** Histological features shared across mesenchymal tumors with DICER1 alteration according to methylation class assignment of LGM1 DICER1, SARC DICER1 and PIS DICER1 and anatomical location. Hematoxylin & Eosin, bar equals 50  $\mu$ m.



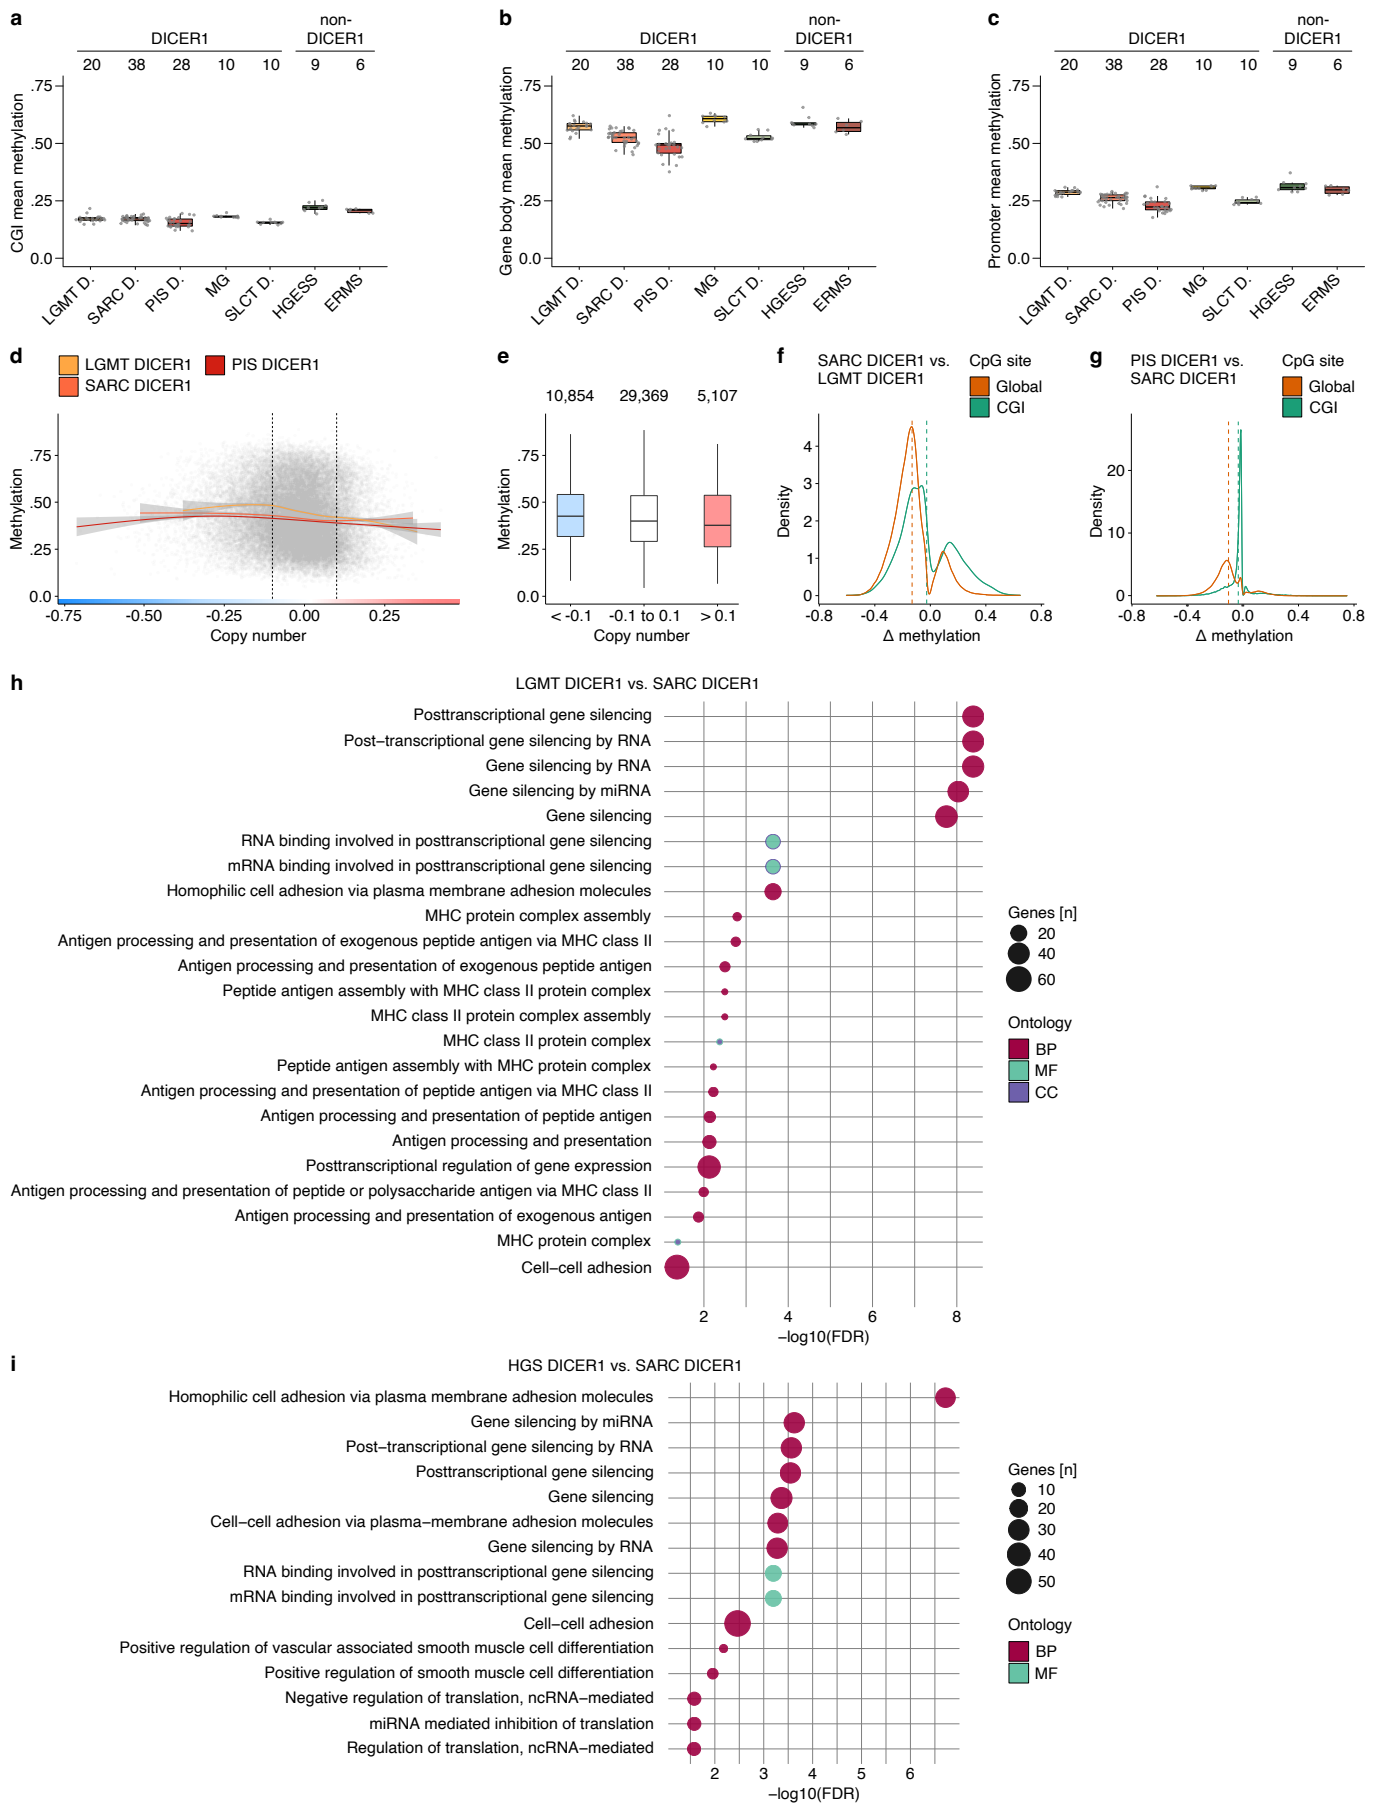

**Supplementary Figure 5: Extended DNA methylation analyses of mesenchymal neoplasms with DICER1 alteration.** **a - c**, (a) DNA methylation levels of CpG-dense regions in CGIs, (b) DNA methylation levels of CpGs in gene bodies and (c) DNA methylation levels of CpGs in promoter regions for samples of LGMT DICER1, SARC DICER1 and PIS DICER1, MG and SLCT DICER1, as well as ERMS and HGESS. Black lines mark the median, edges of boxes denote interquartile range (IQR), and vertical lines indicate  $1.5 \times$  IQR. The number of independent samples is indicated at the top. **d** and **e**, Methylation levels (**d**) and segmented copy number values of all CpGs investigated using locally estimated scatterplot smoothing (LOESS) in groups of LGMT DICER1, SARC DICER1 and PIS DICER1 and (**e**) of all CpGs investigated in DICER1 associated mesenchymal tumors (LGMT DICER1, SARC DICER1 and PIS DICER1) according to groups of segmented copy number values. (**d**) Dashed lines mark copy number values of  $-0.1$  and  $0.1$ . The 95% confidence interval is shaded in grey. (**e**) Black lines mark the median, edges of boxes denote IQR, and vertical lines indicate  $1.5 \times$  IQR. The number of independent samples is indicated at the top. **f** and **g**, Difference ( $\Delta$ ) in methylation according to genome-wide distribution of differentially methylated probes (DMPs) identified in groupwise comparisons between (**f**) SARC DICER1 and LGMT DICER1, and between (**g**) PIS DICER1 and SARC DICER1. Dashed lines mark the mean difference in methylation according to genomewide distribution of DMPs. Fig. S5f and g are corresponding to Fig. 4d. **h** and **i**, Visualization of functional enrichment (gene ontology) analysis of genes overlapping with differentially methylated regions identified in groupwise comparisons between (**h**) LGMT DICER1 vs. SARC DICER1, as well as (**i**) SARC DICER1 vs. PIS DICER1. Supplementary Fig. 5h and i are corresponding to Fig. 4f. BP = biological process, MF = molecular function, CC = cellular component, FDR = false discovery rate.

| Diagnoses                                           | Abbreviation | n  | DICER1 status known |            | DICER1 status unknown |
|-----------------------------------------------------|--------------|----|---------------------|------------|-----------------------|
|                                                     |              |    | 431                 |            | 103                   |
| Total                                               |              |    | DICER1 -mut         | DICER1 -wt |                       |
|                                                     |              |    | 176                 | 255        |                       |
| Alveolar rhabdomyosarcoma                           | ARMS         | 36 | -                   | -          | 36                    |
| Anaplastic sarcoma of the kidney                    | ASK          | 4  | 4                   | -          | -                     |
| Ciliar body medulloepithelioma                      | MEPL         | 12 | 4                   | 3          | 5                     |
| Clear cell renal cell carcinoma                     | RCC          | 40 | 0                   | 40         | -                     |
| Cystic nephroma                                     | CN           | 7  | 6                   | 1          | -                     |
| Embryonal rhabdomyosarcoma                          | ERMS         | 50 | 25                  | -          | 25                    |
| Embryonal tumor with multilayered rosettes          | ETMR         | 26 | 6                   | 20         | -                     |
| High-grade endometrial stromal sarcoma              | HGESS        | 9  | -                   | -          | 9                     |
| Low-grade endometrial stromal sarcoma               | LGESS        | 16 | -                   | -          | 16                    |
| Lung adenocarcinoma                                 | LAC          | 40 | 0                   | 40         | -                     |
| Müllerian adenocarcinoma                            | MAS          | 27 | 6                   | 21         | -                     |
| Müllerian adenocarcinoma/embryonal rhabdomyosarcoma | MAS/ERMS     | 9  | 4                   | 5          | -                     |
| Multinodular goiter                                 | MG           | 14 | 14                  | -          | -                     |
| Nasal chondromesenchymal hamartoma                  | NCMH         | 2  | 2                   | -          | -                     |
| Papillary thyroid carcinoma                         | PCA          | 43 | 3                   | 40         | -                     |
| Pineoblastoma                                       | PINB         | 41 | 11                  | 30         | -                     |
| Pleuropulmonary blastoma                            | PPB          | 21 | 21                  | -          | -                     |
| Primary intracranial sarcoma DICER1                 | PIS DICER1   | 26 | 26                  | -          | -                     |
| Pulmonary blastoma                                  | PB           | 2  | 2                   | -          | -                     |
| Sertoli leydig-cell tumor                           | SLCT         | 63 | 39                  | 23         | 1                     |
| Spindle cell/sclerosing rhabdomyosarcoma            | SRMS         | 11 | -                   | -          | 11                    |
| Wilms tumor                                         | WILMS        | 35 | 3                   | 32         | -                     |

**Supplementary Table 1:** Institutional diagnoses and *DICER1* status of the study cohort (n = 534).



|                 |                 | PIS DICER1 | NCMH | PB       | PPB I/r   | PPB II | PPB III  | CN        | ASK       | ERMS    |
|-----------------|-----------------|------------|------|----------|-----------|--------|----------|-----------|-----------|---------|
| <b>Total</b>    |                 | 26         | 2    | 2        | 6         | 6      | 9        | 7         | 4         | 24      |
| <b>Location</b> | CNS             | 26         | 0    | 0        | 0         | 0      | 0        | 0         | 0         | 0       |
|                 | Head and Neck   | 0          | 2    | 0        | 0         | 0      | 0        | 0         | 0         | 1       |
|                 | Lungs           | 0          | 0    | 2        | 6         | 6      | 9        | 0         | 0         | 0       |
|                 | Kidney          | 0          | 0    | 0        | 0         | 0      | 0        | 7         | 4         | 0       |
|                 | Retroperitoneal | 0          | 0    | 0        | 0         | 0      | 0        | 0         | 0         | 1       |
|                 | Fallopian tube  | 0          | 0    | 0        | 0         | 0      | 0        | 0         | 0         | 1       |
|                 | Uterus          | 0          | 0    | 0        | 0         | 0      | 0        | 0         | 0         | 21      |
| <b>Age</b>      | Range (years)   | 2 to 61    | 8    | 28 to 29 | 0.1 to 11 | 2 to 4 | 0.8 to 4 | 0.4 to 12 | 1.5 to 13 | 6 to 69 |
|                 | Median (years)  | 6,2        | NA   | 28,5     | 0,1       | 3      | 3        | 1,2       | 8,8       | 33,2    |
| <b>Gender</b>   | Female          | 14         | 1    | 2        | 1         | 2      | 4        | 4         | 2         | 23      |
|                 | Male            | 12         | 1    | 0        | 5         | 4      | 5        | 3         | 2         | 1       |
|                 | Ratio (M:F)     | 0,9        | 1    | NA       | 5         | 2      | 1,25     | 1,3       | 1         | 0,04    |

**Supplementary Table 2:** Clinical characteristics of LGMT DICER1, SARC DICER1 and PIS DICER1 according to their institutional diagnoses (n = 86).

| Methylation class            |                        | LGMT DICER1 |     | SARC DICER1 |     | PIS DICER1 |      |
|------------------------------|------------------------|-------------|-----|-------------|-----|------------|------|
| Number of patients           | <b>Total: 86</b>       | 20          |     | 38          |     | 28         |      |
| Cases with available H&E     | <b>Total: 79 (92%)</b> | 18 (90%)    |     | 36 (95%)    |     | 25 (89%)   |      |
| Tumor configuration          | Cystic                 | 13          | 72% | 1           | 3%  | 0          | 0%   |
|                              | Solid, botryoid        | 5           | 28% | 25          | 69% | 0          | 0%   |
|                              | Solid                  | 0           | 0%  | 10          | 27% | 25         | 100% |
| Cambium-like layer           | Present                | 13          | 72% | 25          | 69% | 0          | 0%   |
| Mesenchymal component        | Fibrous stroma         | 5           | 28% | 0           | 0%  | 0          | 0%   |
|                              | Diffuse                | 13          | 72% | 31          | 84% | 8          | 32%  |
|                              | Diffuse/fascicular     | 0           | 0%  | 5           | 14% | 17         | 68%  |
| Cellularity                  | Low                    | 16          | 89% | 2           | 5%  | 0          | 0%   |
|                              | Intermediate           | 1           | 6%  | 22          | 61% | 0          | 0%   |
|                              | High                   | 1           | 6%  | 12          | 32% | 25         | 100% |
| Rhabdomyoblast-like features | Focal                  | 1           | 6%  | 17          | 47% | 12         | 48%  |
|                              | Prominent              | 0           | 0%  | 10          | 27% | 1          | 4%   |
| Chondroid matrix             | Focal                  | 4           | 22% | 9           | 24% | 1          | 4%   |
|                              | Prominent              | 1           | 6%  | 2           | 5%  | 1          | 4%   |
| Anaplasia                    | Focal                  | 1           | 6%  | 7           | 19% | 11         | 44%  |
|                              | Prominent              | 0           | 0%  | 6           | 16% | 5          | 20%  |
| Necrosis                     | Present                | 1           | 6%  | 15          | 41% | 13         | 52%  |

**Supplementary Table 3:** Histopathological characteristics of mesenchymal tumors with DICER1 alteration according to LGMT DICER1, SARC DICER1 and PIS DICER1 cluster assignment (n = 79).



| Methylation class | n  | Mean_Global_No_CGI | Mean_Global_No_CGI_SD | Median_Global_No_CGI | Median_Global_No_CGI_MAD | Mean_CGI | Mean_CGI_SD | Median_CGI | Median_CGI_MAD | Mean_Promoter_region | Mean_Promoter_region_SD | Median_Promoter_region | Median_Promoter_region_MAD | Mean_Gene_body | Mean_Genebodies_SD | Median_Gene_body | Median_Genebodies_MAD |
|-------------------|----|--------------------|-----------------------|----------------------|--------------------------|----------|-------------|------------|----------------|----------------------|-------------------------|------------------------|----------------------------|----------------|--------------------|------------------|-----------------------|
| ERMS              | 6  | 0,596              | 0,031                 | 0,592                | 0,04                     | 0,217    | 0,009       | 0,221      | 0,007          | 0,312                | 0,018                   | 0,313                  | 0,027                      | 0,601          | 0,029              | 0,597            | 0,035                 |
| HGESS             | 9  | 0,62               | 0,038                 | 0,607                | 0,011                    | 0,233    | 0,019       | 0,231      | 0,014          | 0,33                 | 0,027                   | 0,323                  | 0,026                      | 0,624          | 0,028              | 0,614            | 0,009                 |
| SARC DICER1       | 38 | 0,548              | 0,036                 | 0,551                | 0,036                    | 0,179    | 0,012       | 0,18       | 0,011          | 0,273                | 0,019                   | 0,278                  | 0,02                       | 0,552          | 0,033              | 0,553            | 0,034                 |
| LGMT DICER1       | 20 | 0,606              | 0,03                  | 0,61                 | 0,027                    | 0,181    | 0,016       | 0,18       | 0,009          | 0,301                | 0,012                   | 0,302                  | 0,011                      | 0,601          | 0,026              | 0,605            | 0,023                 |
| MG                | 10 | 0,646              | 0,021                 | 0,649                | 0,024                    | 0,192    | 0,007       | 0,191      | 0,004          | 0,322                | 0,008                   | 0,321                  | 0,013                      | 0,637          | 0,019              | 0,639            | 0,019                 |
| PIS DICER1        | 28 | 0,5                | 0,06                  | 0,498                | 0,033                    | 0,163    | 0,021       | 0,159      | 0,021          | 0,241                | 0,03                    | 0,235                  | 0,026                      | 0,512          | 0,054              | 0,518            | 0,026                 |
| SLCT A            | 10 | 0,548              | 0,025                 | 0,539                | 0,011                    | 0,163    | 0,007       | 0,164      | 0,002          | 0,259                | 0,012                   | 0,255                  | 0,012                      | 0,554          | 0,02               | 0,548            | 0,015                 |

**Supplementary Table 4:** DNA methylation levels of global and CpG-dense regions for samples of LGMT DICER1, SARC DICER1, PIS DICER1, MG and SLCT DICER1, as well as ERMS and HGESS (related to Fig. 4a and Supplementary Fig. 5a - c).

| Class vs.   | Class       | DMPs (total) | (0.1,1) | (-0.1,0.1) | (-1,-0.1) | DMRs (total) | (0.1,1) | (-0.1,0.1) | (-1,-0.1) |
|-------------|-------------|--------------|---------|------------|-----------|--------------|---------|------------|-----------|
| PIS DICER1  | LGMT DICER1 | 360534       | 23414   | 90330      | 246790    | 1277         | 58      | 191        | 1028      |
| SARC DICER1 | LGMT DICER1 | 272772       | 29539   | 77525      | 165708    | 1011         | 89      | 212        | 710       |
| PIS DICER1  | SARC DICER1 | 257577       | 17255   | 110487     | 129835    | 629          | 40      | 221        | 368       |

**Supplementary Table 5:** Absolute numbers, and difference ( $\Delta$ ) in methylation of differentially methylated probes (DMPs) and regions (DMRs) identified in a group-wise comparison of LGMT DICER1, SARC DICER1 and PIS DICER1 (related to Fig. 4c and e).



| Group (copy number value) | Mean  | Mean_SD | Median | Median_MAD |
|---------------------------|-------|---------|--------|------------|
| < -0.1                    | 0,438 | 0,151   | 0,43   | 0,163      |
| -0.1 to 0.1               | 0,422 | 0,158   | 0,405  | 0,173      |
| > 0.1                     | 0,404 | 0,164   | 0,383  | 0,191      |

**Supplementary Table 6:** DNA methylation levels of all CpGs in segmented regions investigated in DICER1 associated mesenchymal tumors (LGMT DICER1, SARC DICER1 and PIS DICER1) according to groups of copy number status (related to Supplementary Fig. 5e).
