# Supplementary material for: Genomic characterization of DICER1-associated neoplasms uncovers molecular classes
Source: PubMed Central journal article supplement (PMC10039902; doi:10.1038/s41467-023-37092-w), 2023-03-25
Supplement: 41467_2023_37092_MOESM4_ESM.pdf [file 41467_2023_37092_MOESM4_ESM.pdf]

## **Description of Additional Supplementary Files**

### **Supplementary Data 1**

Description: Case-by-case information on availability of DNA methylation data, methylation cluster assignment and DICER1 mutational status for the study cohort (n = 534).

### **Supplementary Data 2**

Description: Case-by-case clinical and molecular characteristics of LGMT DICER1, SARC DICER1 and PIS DICER1 (n = 86).

### **Supplementary Data 3**

Description: List of genes that were included in targeted sequencing.

### **Supplementary Data 4**

Description: Variants called by targeted DNA sequencing of LGMT DICER1, SARC DICER1 and PIS DICER1 (n = 80).
